# Supplementary material for: Identification and characterization of the binding sequences and target genes of p53 lacking the 1st transactivation domain
Source: PubMed Central journal article supplement — Cancer Sci. 2020 Jan 13;111(2):451–66. doi: 10.1111/cas.14279 (PMC7004532; doi:10.1111/cas.14279), 2020-01-13
Supplement: CAS-111-451-s001.pdf [file CAS-111-451-s001.pdf]

Fig. S1

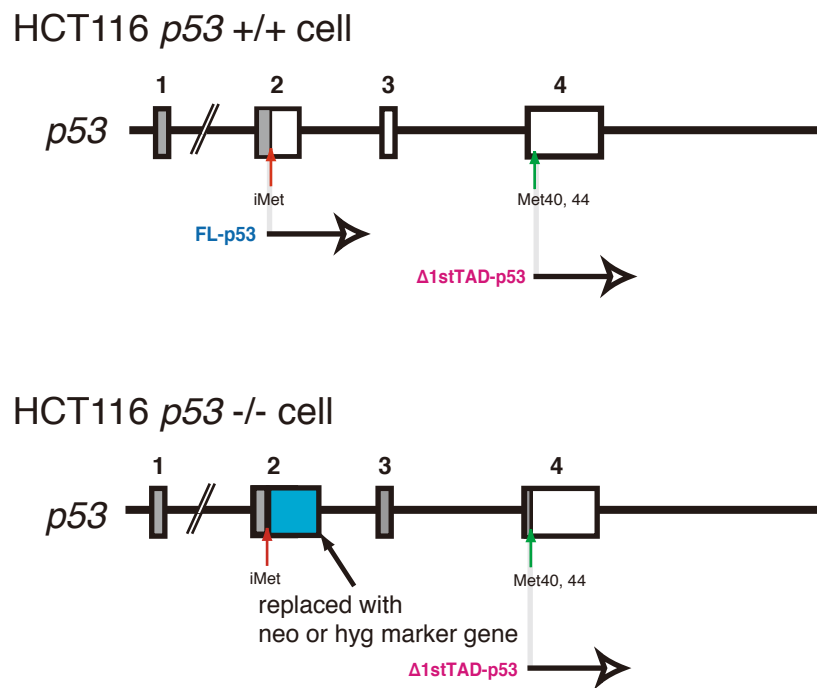

**Fig. S1** Genomic structure of the *p53* gene and expression of FL- and  $\Delta$ 1stTAD-p53 in HCT116 *p53*<sup>+/+</sup> and *p53*<sup>-/-</sup> cells.

HCT116 *p53*<sup>-/-</sup> cells have been artificially created from HCT116 *p53*<sup>+/+</sup> cells (human colorectal carcinoma), and are deficient in FL-p53.

**A**

| Ingenuity Canonical Pathways                           | -log(p-value) | Molecules                |
|--------------------------------------------------------|---------------|--------------------------|
| Pyrimidine Deoxyribonucleotides De Novo Biosynthesis I | 4.47E+00      | TYMS,RRM2B,AK4           |
| VEGF Signaling                                         | 3.55E+00      | PTK2,ACTB,EIF2B3,ACTN1   |
| Regulation of Cellular Mechanics by Calpain Protease   | 3.09E+00      | PTK2,CAPN2,ACTN1         |
| Death Receptor Signaling                               | 2.69E+00      | ACTB,TNFRSF10B,MAP4K4    |
| FAK Signaling                                          | 2.46E+00      | PTK2,ACTB,CAPN2          |
| AMPK Signaling                                         | 2.45E+00      | CPT1A,ACTB,STK11,AK4     |
| Integrin Signaling                                     | 2.43E+00      | PTK2,ACTB,CAPN2,ACTN1    |
| EIF2 Signaling                                         | 2.41E+00      | EIF3D,ACTB,RPS27L,EIF2B3 |
| Actin Cytoskeleton Signaling                           | 2.40E+00      | PTK2,F2R,ACTB,ACTN1      |
| Paxillin Signaling                                     | 2.31E+00      | PTK2,ACTB,ACTN1          |
| Molybdenum Cofactor Biosynthesis                       | 1.96E+00      | GPHN                     |
| Regulation of eIF4 and p70S6K Signaling                | 1.95E+00      | EIF3D,RPS27L,EIF2B3      |
| Tec Kinase Signaling                                   | 1.87E+00      | PTK2,ACTB,TNFRSF10B      |
| Creatine-phosphate Biosynthesis                        | 1.86E+00      | MAP4K4                   |
| dTMP De Novo Biosynthesis                              | 1.86E+00      | TYMS                     |
| Mitotic Roles of Polo-Like Kinase                      | 1.84E+00      | PLK2,CDC27               |
| Germ Cell-Sertoli Cell Junction Signaling              | 1.82E+00      | PTK2,ACTB,ACTN1          |
| Remodeling of Epithelial Adherens Junctions            | 1.81E+00      | ACTB,ACTN1               |
| ILK Signaling                                          | 1.72E+00      | PTK2,ACTB,ACTN1          |
| Agrin Interactions at Neuromuscular Junction           | 1.71E+00      | PTK2,ACTB                |
| Leukocyte Extravasation Signaling                      | 1.68E+00      | PTK2,ACTB,ACTN1          |
| HIPPO signaling                                        | 1.64E+00      | SCRIB,MOB1A              |
| mTOR Signaling                                         | 1.63E+00      | EIF3D,STK11,RPS27L       |
| Thrombin Signaling                                     | 1.62E+00      | PTK2,F2R,ARHGEF3         |
| Protein Kinase A Signaling                             | 1.61E+00      | PTK2,PTPRA,PTP4A1,CDC27  |
| Glioma Invasiveness Signaling                          | 1.59E+00      | PTK2,F2R                 |
| Calcium Transport I                                    | 1.56E+00      | ATP2B4                   |
| Apoptosis Signaling                                    | 1.51E+00      | CAPN2,MAP4K4             |

**B**

| Ingenuity Canonical Pathways                                        | -log(p-value) | Molecules           |
|---------------------------------------------------------------------|---------------|---------------------|
| Cell Cycle Regulation by BTG Family Proteins                        | 3.34E+00      | BTG2,PPP2R5C,PRMT1  |
| HIPPO signaling                                                     | 2.29E+00      | NF2,PPP2R5C,FRMD6   |
| Spermine Biosynthesis                                               | 2.09E+00      | SMS                 |
| Formaldehyde Oxidation II (Glutathione-dependent)                   | 2.09E+00      | ADH5                |
| CTLA4 Signaling in Cytotoxic T Lymphocytes                          | 2.09E+00      | PTPN6,CLTB,PPP2R5C  |
| Inosine-5'-phosphate Biosynthesis II                                | 1.91E+00      | ATIC                |
| 1D-myo-inositol Hexakisphosphate Biosynthesis V (from Ins(1,3,4)P3) | 1.91E+00      | IPPK                |
| Tetrapyrrole Biosynthesis II                                        | 1.69E+00      | HMBS                |
| Phagosome Maturation                                                | 1.65E+00      | VPS39,PRDX5,VAMP3   |
| Selenocysteine Biosynthesis II (Archaea and Eukaryotes)             | 1.62E+00      | SEPHS1              |
| Glycogen Biosynthesis II (from UDP-D-Glucose)                       | 1.62E+00      | GBE1                |
| Autophagy                                                           | 1.59E+00      | VPS39,NBR1          |
| Mitotic Roles of Polo-Like Kinase                                   | 1.53E+00      | FBXO5,PPP2R5C       |
| Regulation of eIF4 and p70S6K Signaling                             | 1.50E+00      | RPS19,RPS16,PPP2R5C |

**Fig. S2** The ingenuity canonical pathways of the potential target genes of  $\Delta 1$ stTAD-p53.

A. Pathway for genes with binding sites common for FL- and  $\Delta 1$ stTAD-p53. *PLK2*, *PTP4A1* and *RPS27L* genes are shown in red.

B. Pathway for genes specifically bound by  $\Delta 1$ stTAD-p53.

A

| Gene Symbol | Probe Set ID | FL-p53 without treatment |        |        | $\Delta$ 1stTAD-p53 without treatment |        |        | $\Delta$ 1stTAD-p53 serum deprived |        |        |
|-------------|--------------|--------------------------|--------|--------|---------------------------------------|--------|--------|------------------------------------|--------|--------|
|             |              |                          |        |        |                                       |        |        |                                    |        |        |
| PLK2        | 201939_at    | 174.6                    | 261.6  | 261.6  | 497.2                                 | 643.9  | 660.5  | 438.5                              | 471.9  | 384.3  |
| PTP4A1      | 200731_s_at  | 474.8                    | 569.7  | 569.7  | 1192.9                                | 910.1  | 1215.7 | 1046.6                             | 1245.3 | 1216.5 |
| RPS27L      | 218007_s_at  | 2398                     | 2136.5 | 2136.5 | 1926.6                                | 1889.5 | 1960.4 | 2653.3                             | 2696.2 | 2193.5 |

B

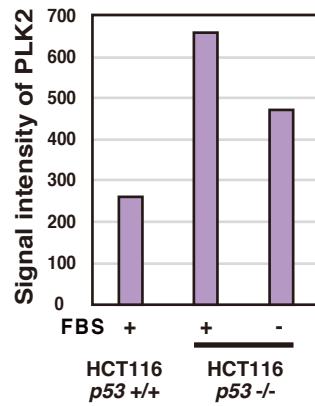

C

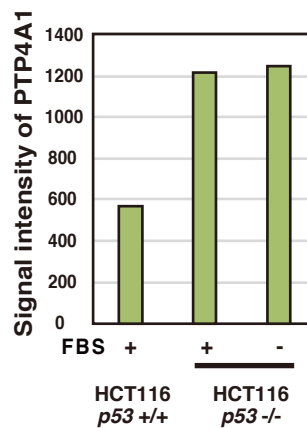

D

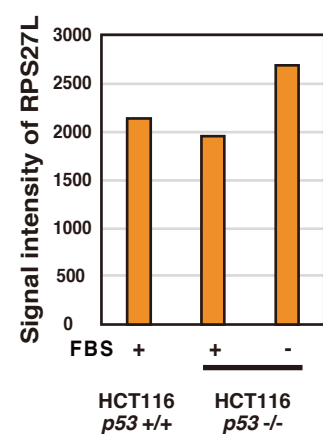

**Fig. S3** Endogenous  $\Delta$ 1stTAD-p53 induces *PLK2*, *PTP4A1* and *RPS27L*.

A. Expression of *PLK2* (201939\_at), *PTP4A1* (200731\_s\_at), and *RPS27L* (218007\_s\_at) were analyzed by microarray expression analysis using HCT 116 *p53* +/+ and -/- cells. HCT116 *p53* -/- cells were cultured in normal FBS or subjected to FBS deprivation.

For each condition, 3 independent samples were analyzed.

B-D. Representative microarray expression analysis results of *PLK2* (B), *PTP4A1* (C), and *RPS27L* (D) expression are shown.

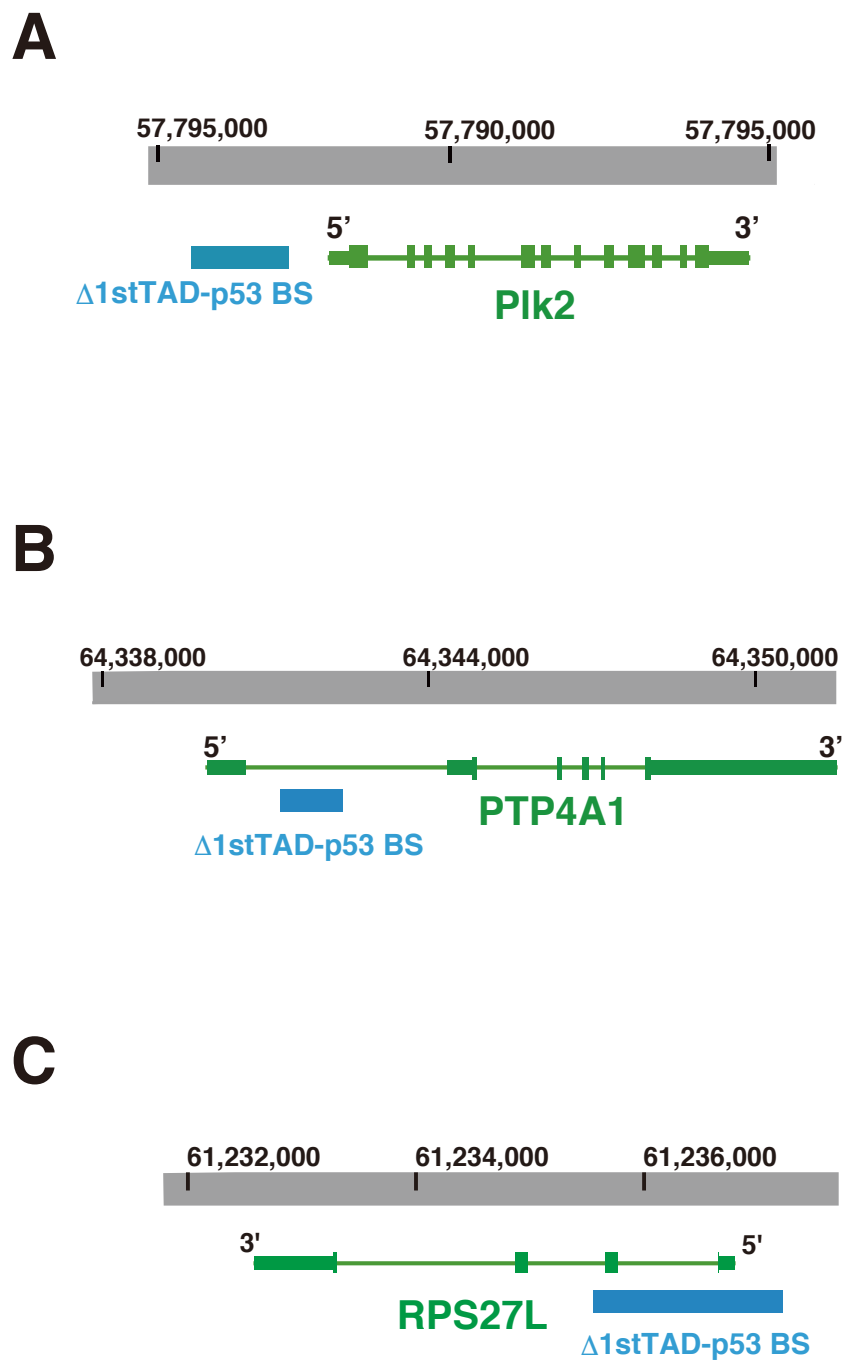

**Fig. S4**  $\Delta$ 1stTAD-p53 binds to the genomic region of the *PLK2*, *PTP4A1* and *RPS27L* genes.

Serum-deprived HCT116 *p53*<sup>-/-</sup> cells were harvested, and p53 ChIP-chip analysis using anti-p53 antibody (FL393) was performed. Genomic loci of *PLK2* (A), *PTP4A1* (B) and *RPS27L* (C) are shown together with the results obtained. Blue areas indicate the p53-binding region. The resulting sequences were mapped to the build #36 reference human genome (hg18).

Fig.S5

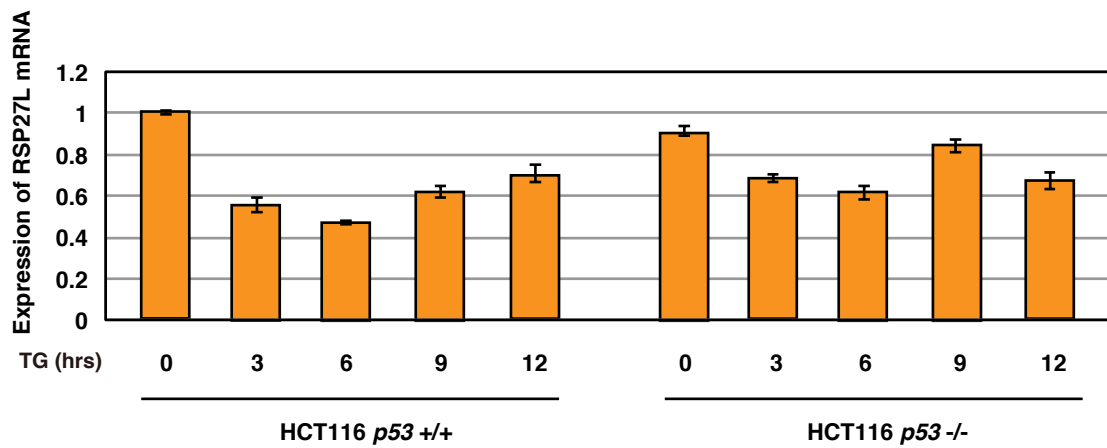

**Fig. S5** *RPS27L* is not induced upon ER stress.

HCT 116 *p53*<sup>+/+</sup> and *p53*<sup>-/-</sup> cells were treated with TG and analyzed as in Fig. 6. *RPS27L* mRNA levels were analyzed by quantitative RT-PCR.
